# Supplementary material
Source: PubMed Central journal article supplement (PMC3457517)
Supplement: AEM.01223-12_zam999103672so1.pdf [file AEM.01223-12_zam999103672so1.pdf]

1 **Dissolved Organic Carbon Influences Microbial Community**  
2 **Composition and Diversity in Managed Aquifer Recharge**  
3 **Systems**

4 Dong Li<sup>1,2</sup>, Jonathan O. Sharp<sup>2</sup>, Pascal E. Saikaly<sup>1</sup>, Shahjahan Ali<sup>3</sup>, Mazahirali  
5 Alidina<sup>1</sup>, Mohammed S Alarawi<sup>3</sup>, Stephanie Keller<sup>1</sup>, Christiane Hoppe-Jones<sup>2</sup>, and  
6 Jörg E. Drewes<sup>1,2\*</sup>

7 <sup>1</sup>*Water Reuse and Desalination Center (WDRC), King Abdullah University of Science*  
8 *and Technology, Thuwal, Saudi Arabia*

9 <sup>2</sup>*NSF Engineering Research Center ReNUWIt, Civil and Environmental Engineering,*  
10 *Colorado School of Mines, Golden, CO, USA*

11 <sup>3</sup>*Biosciences Core Laboratory, King Abdullah University of Science and Technology,*  
12 *Thuwal, Saudi Arabia*

13

14 Running Title: Microbial Community Structure in MAR Systems

15

16

17

18

19

20

21

22

23

24

25

26 \* Corresponding author: JE Drewes, Water Reuse and Desalination Center, King  
27 Abdullah University of Science and Technology, Thuwal 23955-6900, Saudi Arabia.  
28 E-mail: Jorg.Drewes@kaust.edu.sa

29 Supplementary Information

30 **Archaeal community structures in field- and laboratory-scale MAR systems**

31 As shown in Table S2, few *Crenarchaeota* were detected in the intermediate  
32 infiltration zone samples, averaging 0.004% of total sequences. Compared to  
33 *Crenarchaeota*, significantly higher ratios of total sequences with an average of  
34 0.14% were affiliated with *Euryarchaeota* for intermediate infiltration zone samples  
35 (Wilcoxon matched-pair test,  $P < 0.001$ ). Similar findings were also observed for  
36 samples from the shallow infiltration zone and the unsaturated riverbed. The relative  
37 abundances of *Crenarchaeota* were less than 0.02% for both rivers in shallow  
38 infiltration zones. The ratios of *Euryarchaeota* among the total sequences of each  
39 sample were much higher, with average values of 0.13% for South Platte and Taif  
40 shallow samples, and as high as 2% in the unsaturated riverbed samples.

41 *Methanobacteria* and *Methanomicrobia* were the most abundant archaeal classes in  
42 the *Euryarchaeota* phylum for intermediate infiltration zone samples, with the relative  
43 ratios of 0.07% and 0.04% of the total sequences, respectively. These two ratios  
44 decreased to 0.01% and 0.006%, while the average ratio of *Halobacteria* belonging to  
45 *Euryarchaeota* increased to 0.01% for shallow infiltration zone samples. *Halobacteria*  
46 became the most abundant archaea affiliated with *Euryarchaeota* in all unsaturated  
47 riverbed samples, with the average ratio of 1.58% of the total sequences. Meanwhile,  
48 both *Methanobacteria* and *Methanomicrobia* consisted of less than 0.01% of the total  
49 sequences in all unsaturated riverbed samples. No significant difference was observed  
50 for archaeal distribution on phylum level among sediment samples taken from the  
51 same sampling location at different depths (Kendall's W matched-pair test, all  
52  $P > 0.05$ ).

53 For saturated sediment columns, *Archaea* were also detected in both the moderate  
54 and low DOC columns. Less than 0.03% of the total sequences were assigned to  
55 *Crenarchaeota* in each sediment sample, with the ratio of *Euryarchaeota* ranging  
56 from 0.02% to 0.06% and *Halobacteria* as the most abundant class in *Euryarchaeota*  
57 with the average ratio of 0.02%.

58

59 TABLE S1. Oligonucleotide primers used in this study

| Primer | Specificity     | Sequence (5'–3')          | Target genes | Application    | Reference                     |
|--------|-----------------|---------------------------|--------------|----------------|-------------------------------|
| 515F   | Universal       | GTGYCAGCMGCCGCGGTAA       | 16S rRNA     | Pyrosequencing | Caporaso <i>et al.</i> , 2011 |
| 806R   | Universal       | GGACTACHVGGGTWTCTAAT      | 16S rRNA     | Pyrosequencing | Caporaso <i>et al.</i> , 2011 |
| 341F   | <i>Bacteria</i> | CCTACGGGAGGCAGCAG         | 16S rRNA     | qPCR           | Muyzer <i>et al.</i> , 1993   |
| 518R   | <i>Bacteria</i> | ATTACCGCGGCTGCTGG         | 16S rRNA     | qPCR           | Muyzer <i>et al.</i> , 1993   |
| 516F   | <i>Archaea</i>  | TGYCAGCCGCCGCGGTAAHACCVGC | 16S rRNA     | qPCR           | Takai and Horikoshi, 2000     |
| 806R   | <i>Archaea</i>  | GGACTACVSGGGTATCTAAT      | 16S rRNA     | qPCR           | Takai and Horikoshi, 2000     |
| ITS1F  | <i>Fungi</i>    | TCCGTAGGTGAACCTGCGG       | -            | qPCR           | Chow <i>et al.</i> , 2009     |
| 5.8S   | <i>Fungi</i>    | CGCTGCGTTCTTCATCG         | -            | qPCR           | Chow <i>et al.</i> , 2009     |
| 27F    | <i>Bacteria</i> | AGAGTTTGATCCTGGCTCAG      | 16S rRNA     | Cloning        | Chivian <i>et al.</i> , 2008  |
| 1492R  | Universal       | GGTTACCTTGTTACGACTT       | 16S rRNA     | Cloning        | Chivian <i>et al.</i> , 2008  |
| A20F   | <i>Archaea</i>  | TCCGGTTGATCCTGCCRG        | 16S rRNA     | Cloning        | Chivian <i>et al.</i> , 2008  |

60

61

61 TABLE S2. Relative abundance (%) of major Archaeal phyla and classes in river and  
 62 sediment column samples

| Sample Site            | Taif and South Platte Rivers |                               |             | Moderate<br>DOC<br>Columns | Low DOC<br>Columns |
|------------------------|------------------------------|-------------------------------|-------------|----------------------------|--------------------|
|                        | Infiltration<br>zone 1-2 cm  | Infiltration zone<br>10-50 cm | Unsaturated |                            |                    |
| <i>Crenarchaeota</i>   | 0.004                        | 0.02                          | 0.10        | 0.02                       | 0                  |
| <i>Euryarchaeota</i>   | 0.14                         | 0.13                          | 2.0         | 0.06                       | 0.02               |
| <i>Halobacteria</i>    | 0                            | 0.01                          | 1.58        | 0.03                       | 0                  |
| <i>Methanobacteria</i> | 0.07                         | 0.01                          | 0.006       | 0.006                      | 0                  |
| <i>Methanomicrobia</i> | 0.04                         | 0.006                         | 0.002       | 0.004                      | 0.006              |

63

64

64

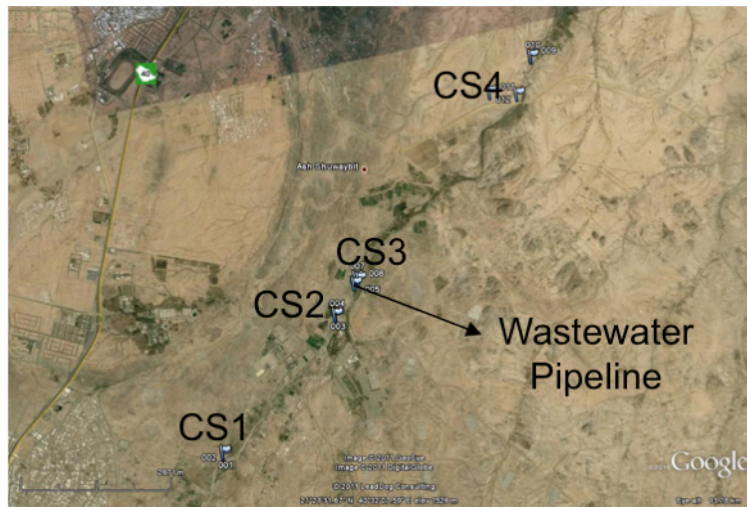

65

66

(a)

68

70

72

74

76

78

80

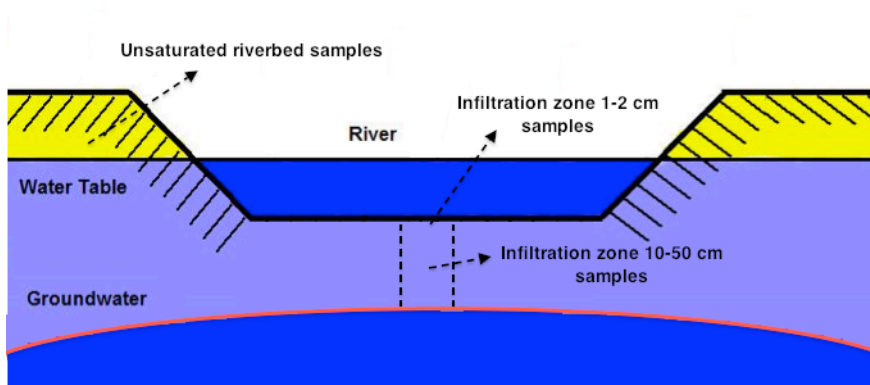

81

(b)

82 FIG. S1. (a) Sampling map of the Taif River in Saudi Arabia; (b) Sketch map of  
83 sampling locations of shallow infiltration zone (1-2 cm), intermediate infiltration zone  
84 (10-50 cm), and unsaturated riverbed samples.

85

86

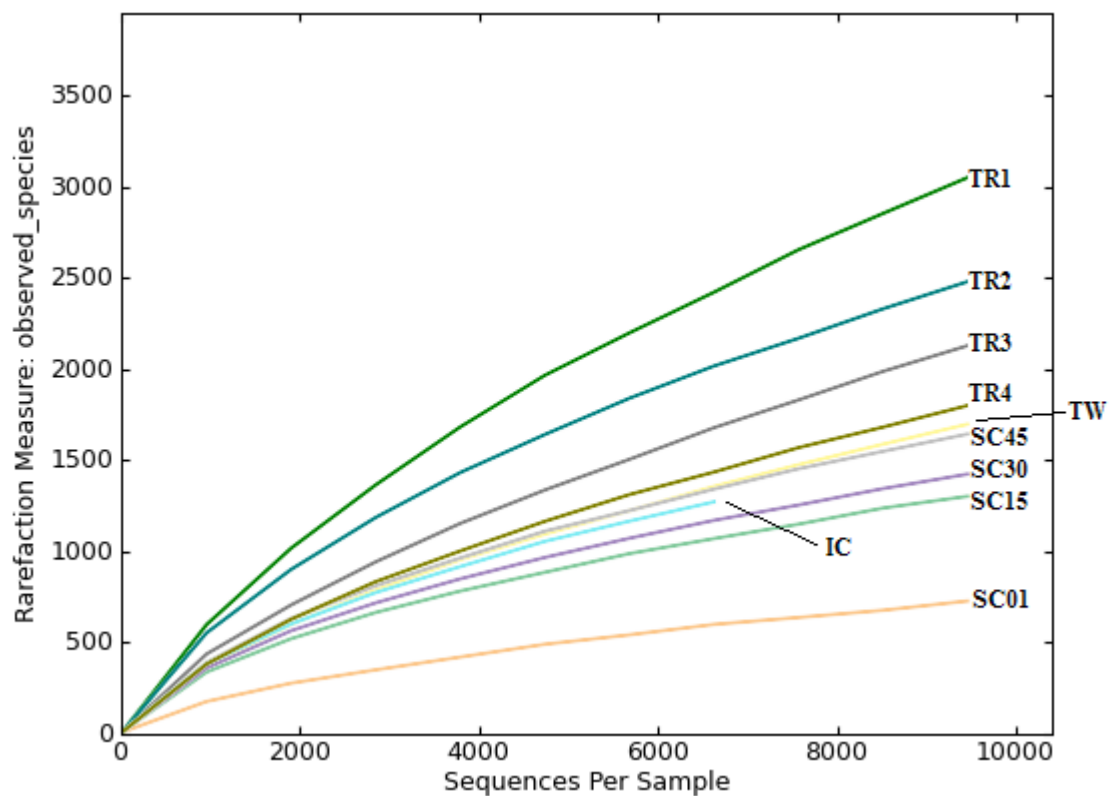

86

87 FIG. S2. Rarefaction curves of bacterial and archaeal 16S rRNA pyrosequencing  
 88 reads for representative samples fully spanning the range found this study. TR1-4:  
 89 Taif River cross section 1-4; TW: Taif wastewater effluent; SC01, 15, 30 and 45:  
 90 moderate DOC laboratory column 1 cm, 15 cm, 30 cm and 45 cm; IC: low DOC  
 91 laboratory column.

92

93

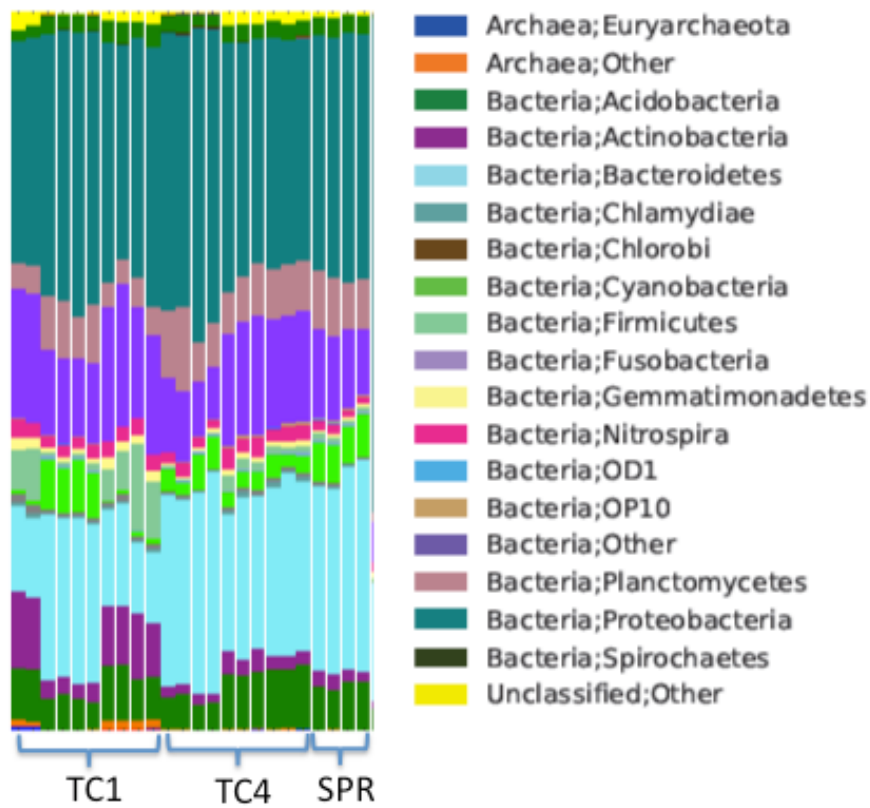

FIG. S3. The microbial phyla distribution of representative sediment samples derived from shallow and intermediate infiltration zones of Taif River cross sections 1 (TC1) and 4 (TC4), as well as South Platte River (SPR) collected in different seasons.

- 97 1. **Caporaso, J. G., C. L. Lauber, W. A. Walters, D. Berg-Lyons, C. A.**  
98 **Lozupone, P. J. Turnbaugh, N. Fierer, and R. Knight.** 2011. Global patterns  
99 of 16S rRNA diversity at a depth of millions of sequences per sample. *Proc. Natl.*  
100 *Acad. Sci. USA* **108**:4516-4522.
- 101 2. **Muyzer, G., E. C. D. Waal, and A. G. Uitterlinden.** 1993. Profiling of complex  
102 microbial populations by denaturing gradient gel electrophoresis analysis of  
103 polymerase chain reaction-amplified genes coding for 16S rRNA. *Appl. Environ.*  
104 *Microbiol.* **59**:695-700.
- 105 3. **Takai, K., and K. Horikoshi.** 2000. Rapid detection and quantification of  
106 members of the archaeal community by quantitative PCR using fluorogenic  
107 probes. *Appl. Environ. Microbiol.* **66**:5066-5072.
- 108 4. **Chow, S., Y. Ueno, M. Toyokawa, I. Oohara, and H. Takeyama.** 2009.  
109 Preliminary analysis of length and GC content variation in the ribosomal first  
110 internal transcribed spacer (ITS1) of marine animals. *Mar. Biotechnol.*  
111 **11**:301–306.
- 112 5. **Chivian, D., E. L. Brodie, E. J. Alm, D. E. Culley, P. S. Dehal, T. Z. DeSantis,**  
113 ***et al.*** 2008. Environmental genomics reveals a single-species ecosystem deep  
114 within earth. *Science* **322**:275-278.
